# Supplementary material for: Continuous-flow synthesis of vitamin D3
Source: Royal Society of Chemistry journal article supplement (doi:10.1039/c0cc02239j), 2010-01-01
Supplement: c0cc02239j.pdf [file c0cc02239j.pdf]

## Supporting Information

### Continuous-Flow Synthesis of Vitamin D<sub>3</sub>

Shinichiro Fuse,<sup>a</sup> Nobutake Tanabe,<sup>a</sup> Masahito Yoshida,<sup>b</sup> Hayato Yoshida,<sup>a</sup> Takayuki Doi<sup>b</sup> and

Takashi Takahashi<sup>\*a</sup>

<sup>a</sup> Department of Applied Chemistry, Tokyo Institute of Technology, 2-12-1 Ookayama, Meguro, Tokyo 152-8552, Japan.

<sup>b</sup> Graduate School of Pharmaceutical Sciences, Tohoku University, 6-3 Aza-Aoba, Aramaki, Aoba, Sendai 980-8578, Japan.

ttak@apc.titech.ac.jp

#### 1. General Techniques.

Provitamin D<sub>3</sub> (7-dehydrocholesterol) was purchased from Aldrich. Vitamin D<sub>3</sub>, 1,4-dioxane, toluene and butanol were purchased from TCI. All chemical reagents were used as received. Analytical high-performance liquid chromatography (HPLC) was carried on a Waters 2695 Separation Module using a Senshu Pak PEGASIL Silica-3301-N (8Φ × 300 mm) or Daicel Chiralpak AD-H (4.6Φ × 250 mm) with a Waters 2996 Photodiode Array Detector. Preparative HPLC was carried on a Waters 515 HPLC Pump using a Senshu Pak PEGASIL Silica 60-5 (20Φ ×

250 mm) with a SSC-5200 and Shodex RI-71. UV absorption was measured with a Perkin-Elmer Lambda 40 UV/VIS spectrometer. The custom-made microreactors, a syringe pump (SSC-3710) and its regulating system (SSC-3792) were purchased from Senshu Scientific Co. Ltd.

Microreactor is made of quartz and has a channel that is 200  $\mu\text{m}$  deep, 1 mm wide, and 250 mm long with a volume of 50  $\mu\text{L}$  (Figure 1).

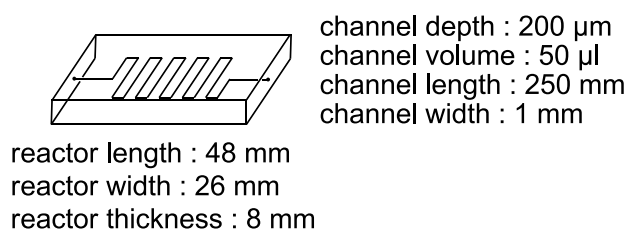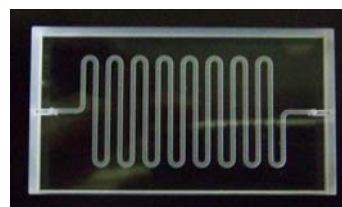

Figure 1.

The microreactors and syringe pump (Senshu Scientific Co. Ltd. SSC-3710) were connected with PEEK tubing. The microreactors were stored in the holders those were made of PEEK (Figure 2).

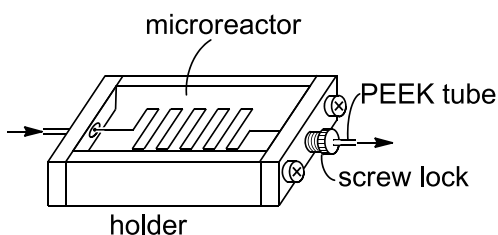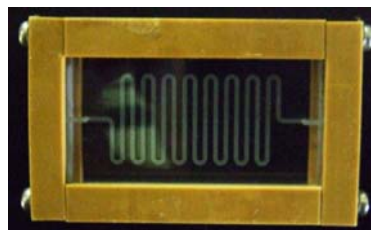

Figure 2.

400 W high-pressure mercury lamp, a Vycor filter and a glass UV filter (U-360) were purchased

from Riko Kagaku Sangyo. The irradiation at 360 nm was generated by using a 400 W high-pressure mercury lamp with a Vycor filter and a glass UV filter.

## 2. Experimental Detail

**Photolysis of provitamin D<sub>3</sub> (3) (batch reactor, HPLC-UV yield).** A solution of provitamin D<sub>3</sub> (3) (77 mg, 0.20 mmol, 20 mM) in 10 mL of THF was added into a quartz test tube (13Φ). The solution was irradiated with 400 W high-pressure mercury lamp with a Vycor filter at -10 °C for 150 min. Then 5 μL of the mixture was collected and analyzed by HPLC. The composition of products was calculated based on the relative UV absorption after allowance was made for the extinction coefficient (Table 2) at 282 nm.

vitamin D<sub>3</sub> (1): 2%, provitamin D<sub>3</sub> (3): 50%, previtamin D<sub>3</sub> (4): 20%, lumisterol (5): 25%, tachysterol (6): 3%

**High-performance liquid chromatography.** Reaction products were analyzed by HPLC eluted with 20% ethyl acetate in hexane at a constant flow rate of 3 mL/min and the column was kept at 30 °C. The composition of products was calculated based on the relative UV absorption after allowance was made for the extinction coefficient at 282 nm (Table 2). Retention time of reaction products was shown in Table 1.

|                      |                                     |                                        |                                                   |
|----------------------|-------------------------------------|----------------------------------------|---------------------------------------------------|
| compound             | vitamin D <sub>3</sub> ( <b>1</b> ) | provitamin D <sub>3</sub> ( <b>3</b> ) | previtamin D <sub>3</sub> ( <b>4</b> )            |
| Retention time (min) | 13.4                                | 15.9                                   | 8.4                                               |
| compound             | lumisterol ( <b>5</b> )             | tachysterol ( <b>6</b> )               | <i>trans</i> -vitamin D <sub>3</sub> ( <b>7</b> ) |
| Retention time (min) | 10.7                                | 12.7                                   | 8.6                                               |

Table 1.

### 3. Physical Data

**Molar extinction coefficient.** Molar extinction coefficient of reaction products was measured in 20% ethyl acetate in hexane. Provitamin D<sub>3</sub> (**3**) and vitamin D<sub>3</sub> (**1**) were used as received. Previtamin D<sub>3</sub> (**4**), lumisterol (**5**), tachysterol (**6**) and *trans*-vitamin D<sub>3</sub> (**7**) were prepared in our laboratory by the photo-isomerization of provitamin D<sub>3</sub> (**3**) or vitamin D<sub>3</sub> (**1**).

**Preparation of previtamin D<sub>3</sub> (**4**), lumisterol (**5**) and tachysterol (**6**).** Provitamin D<sub>3</sub> (**1**) (76.9 mg, 0.200 mmol) in THF (10.0 ml) was irradiated with 400 W high-pressure mercury lamp with a Vycor filter at −10 °C for 150 min. The reaction mixture was concentrated in vacuo and the crude residue was subjected to preparative HPLC (10% ethyl acetate in hexane, flow rate; 6 mL/min) yielding previtamin D<sub>3</sub> (**4**) (16.8 mg, 0.0436 mmol, 21%), lumisterol (**5**) (11.7 mg, 0.0304 mmol, 15%) and tachysterol (**6**) (6.5 mg, 0.017 mmol, 9%).

**Preparation of *trans*-vitamin D<sub>3</sub> (**7**).** Vitamin D<sub>3</sub> (**1**) (76.9 mg, 0.200 mmol) in THF (10.0 ml)

was irradiated with 400 W high-pressure mercury lamp with a Vycor filter at  $-10\text{ }^{\circ}\text{C}$  for 180 min.

The reaction mixture was concentrated in vacuo and the crude residue was subjected to preparative HPLC (10% ethyl acetate in hexane, flow rate; 6 mL/min) yielding *trans*-vitamin D<sub>3</sub> (7.2 mg, 0.019 mmol, 9%). The determined molar extinction coefficient of reaction products at 282 nm was shown in the Table 2.

| compound              | vitamin D <sub>3</sub> ( <b>1</b> ) | provitamin D <sub>3</sub> ( <b>3</b> ) | previtamin D <sub>3</sub> ( <b>4</b> )            |
|-----------------------|-------------------------------------|----------------------------------------|---------------------------------------------------|
| $\epsilon$ [l/mol·cm] | 8900                                | 9400                                   | 4900                                              |
| compound              | lumisterol ( <b>5</b> )             | tachysterol ( <b>6</b> )               | <i>trans</i> -vitamin D <sub>3</sub> ( <b>7</b> ) |
| $\epsilon$ [l/mol·cm] | 5000                                | 20000                                  | 22000                                             |

Table 2.
